# Supplementary material for: Preparation of Nickel Oxide Nanoflakes for Carrier Extraction and Transport in Perovskite Solar Cells
Source: MDPI journal article supplement (doi:10.3390/nano12193336), 2022-09-25
Supplement: s1 [file s1]

## Supporting Information

# Preparation of Nickel Oxide Nanoflakes for Carrier Extraction and Transport in Perovskite Solar Cells

Chih-Yu Chang <sup>1</sup>, You-Wei Wu <sup>1</sup>, Sheng-Hsiung Yang <sup>1,\*</sup> and Ibrahim Abdulhalim <sup>2</sup>

<sup>1</sup> Institute of Lighting and Energy Photonics, College of Photonics, National Yang Ming Chiao Tung University, No.301, Section 2, Gaofa 3rd Road, Guiren District, Tainan 71150, Taiwan

<sup>2</sup> Department of Electro-Optics and Photonics Engineering and the Ilse Katz Institute for Nanoscale Science and Technology, School of Electrical and Computer Engineering, Ben-Gurion University of the Negev, Beer-Sheva 8410501, Israel

\* Correspondence: yangsh@nycu.edu.tw

**Table S1.** Lifetime parameters of TR-PL curves of the perovskite on the FTO substrate, PTAA, NiO<sub>x</sub> thin film/PTAA, and NiO<sub>x</sub> nanoflakes/PTAA.

| Substrate                        | A <sub>1</sub> (%) | $\tau_1$ (ns) | A <sub>2</sub> (%) | $\tau_2$ (ns) | $\tau_{avg}$ (ns) |
|----------------------------------|--------------------|---------------|--------------------|---------------|-------------------|
| FTO                              | 54.9               | 10.56         | 45.3               | 147.13        | 139.5             |
| PTAA                             | 50.69              | 16.07         | 49.31              | 103.02        | 91                |
| NiO <sub>x</sub> thin film/PTAA  | 51.29              | 16.51         | 48.71              | 83.9          | 72.34             |
| NiO <sub>x</sub> nanoflakes/PTAA | 55.61              | 13.95         | 44.39              | 64.04         | 53.3              |

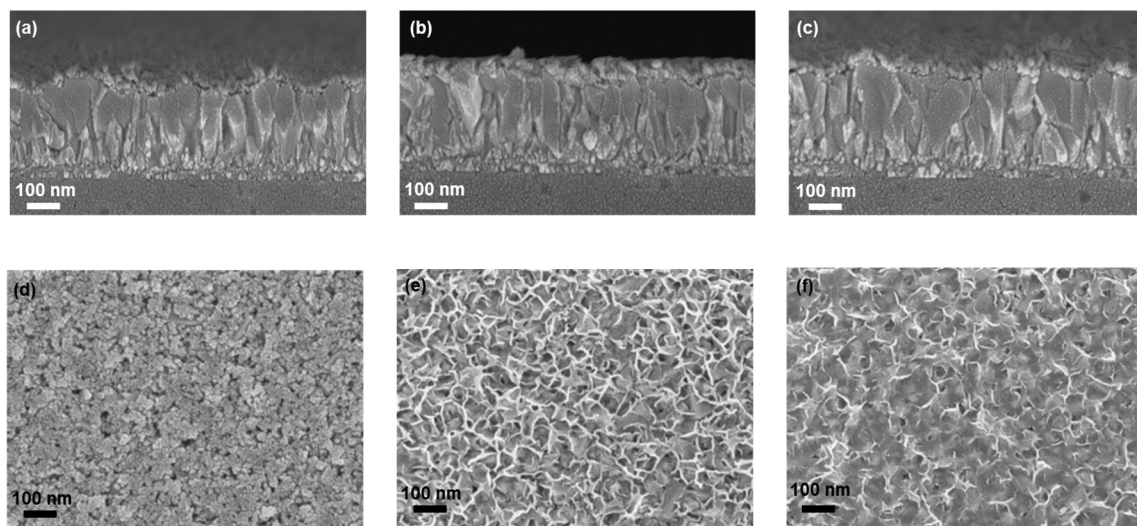

**Figure S1.** Cross-sectional and top-view SEM images of (a,d) ZnO nanorods, (b,e) mesoporous NiO<sub>x</sub> before ZnO etching, and (c,f) NiO<sub>x</sub> nanoflakes after ZnO etching.

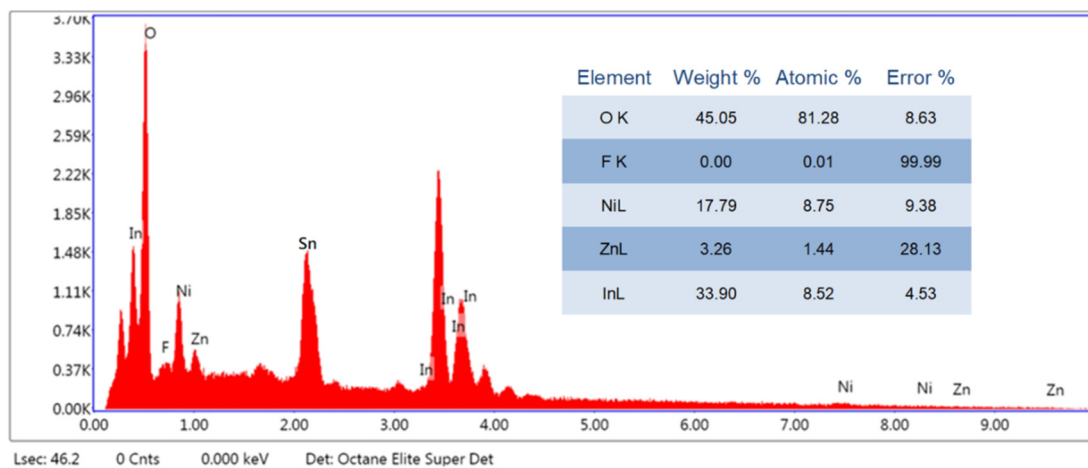

**Figure S2.** EDS spectrum of the NiO<sub>x</sub> nanoflakes.

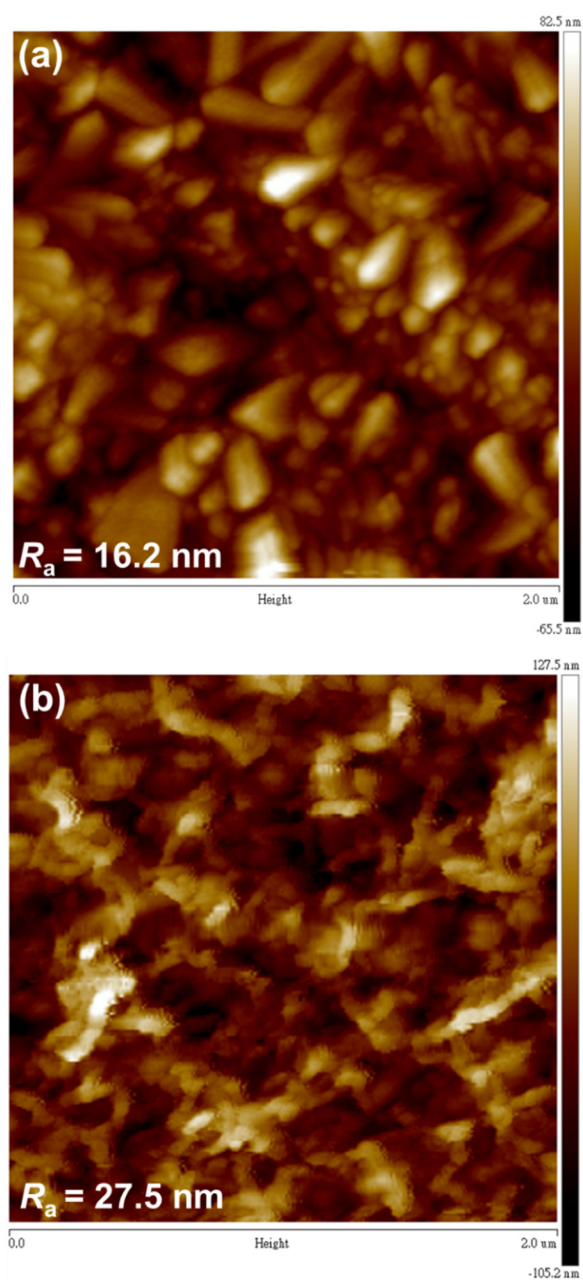

**Figure S3.** AFM topographic images of the NiO<sub>x</sub> (a) thin film and (b) nanoflakes.

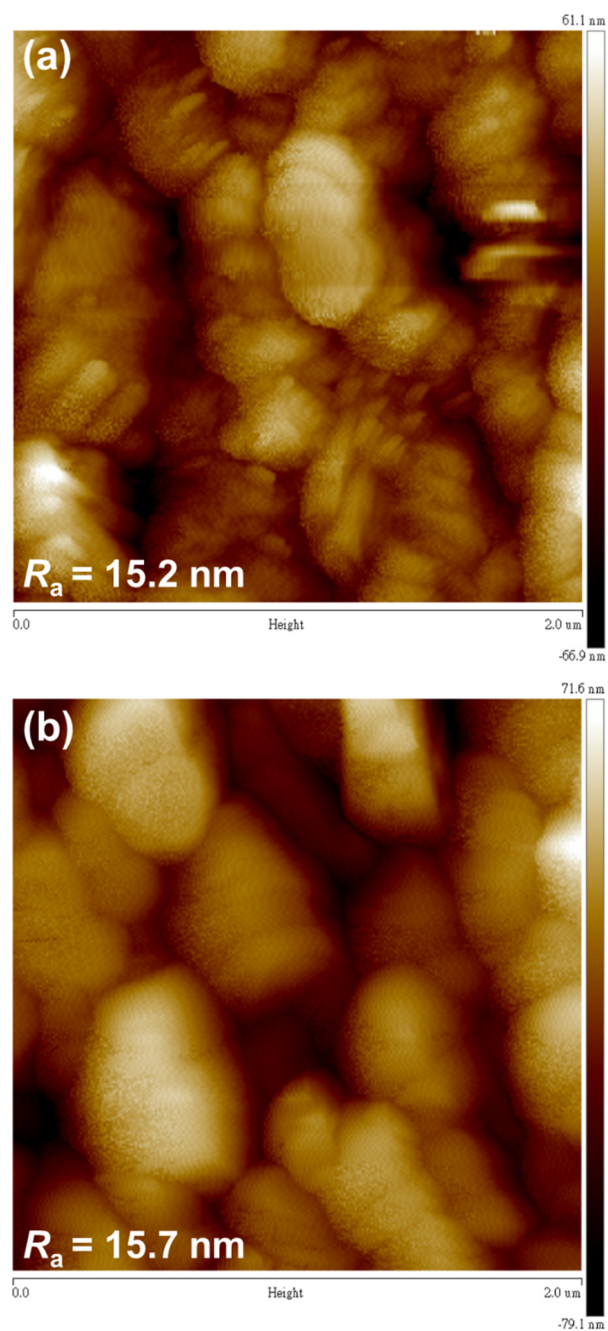

**Figure S4.** AFM topographic images of the perovskite on the (a) NiO<sub>x</sub> thin film/PTAA and (b) NiO<sub>x</sub> nanoflakes/PTAA.

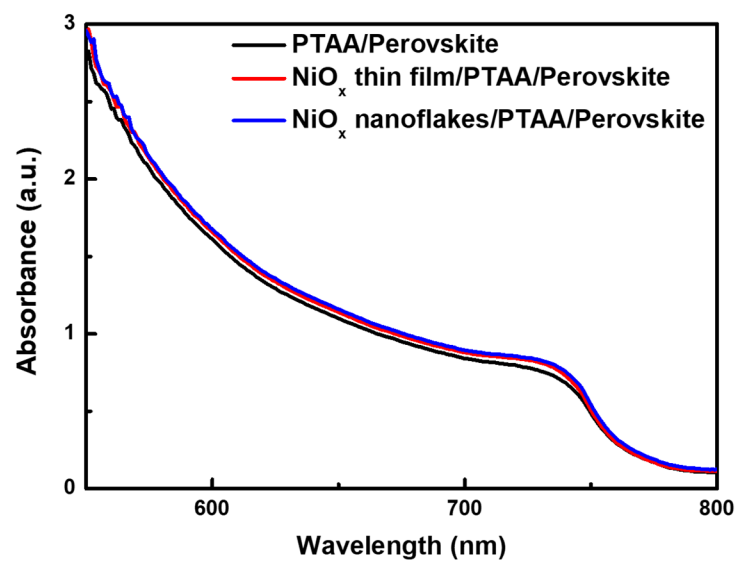

**Figure S5.** Absorption spectra of the perovskite on PTAA, NiO<sub>x</sub> thin film/PTAA, and NiO<sub>x</sub> nanoflakes/PTAA.

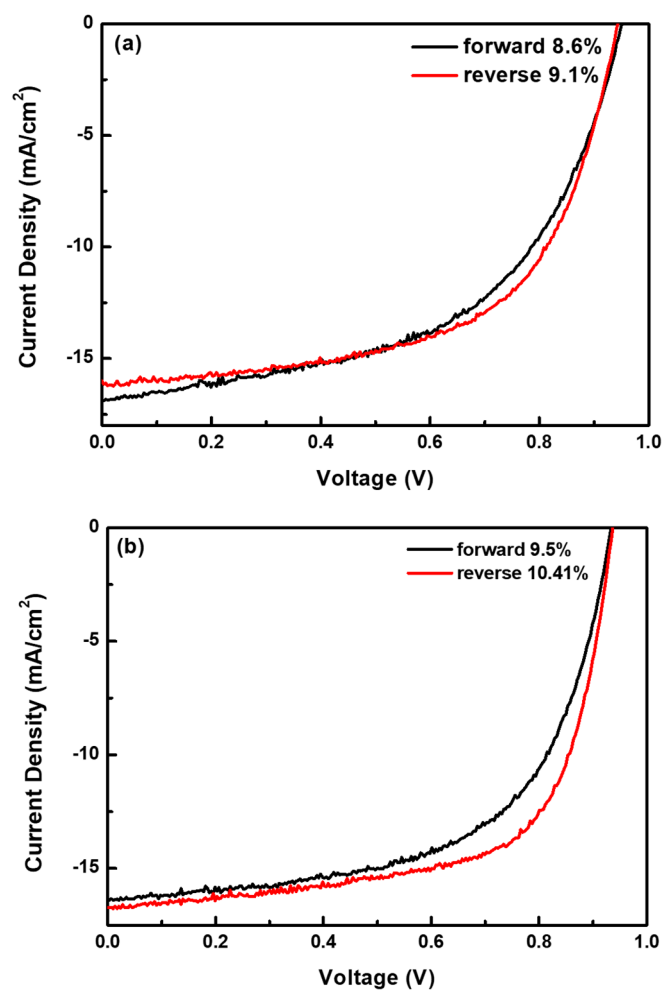

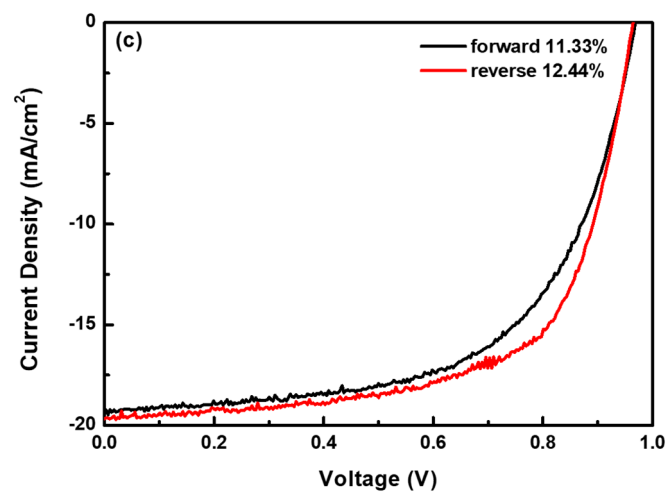

**Figure S6.** J-V characteristics and PCE values of the devices using (a) PTAA, (b) NiO<sub>x</sub> thin film, and (c) NiO<sub>x</sub> nanoflakes as the HTL.

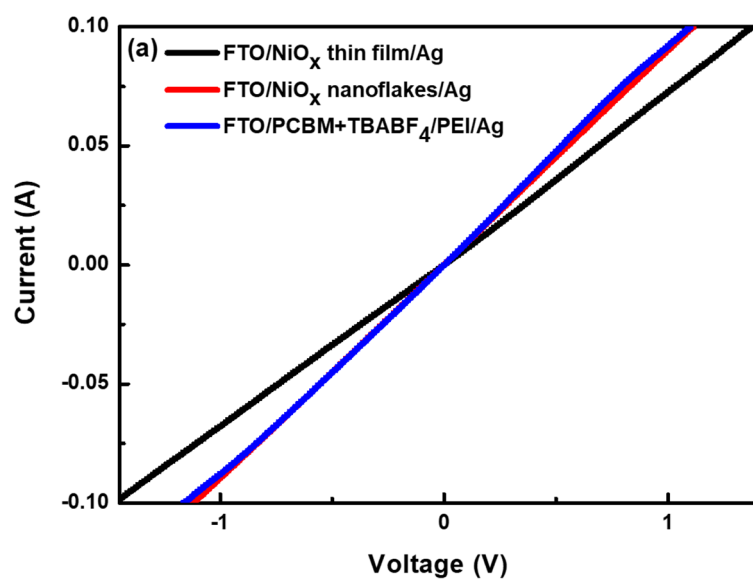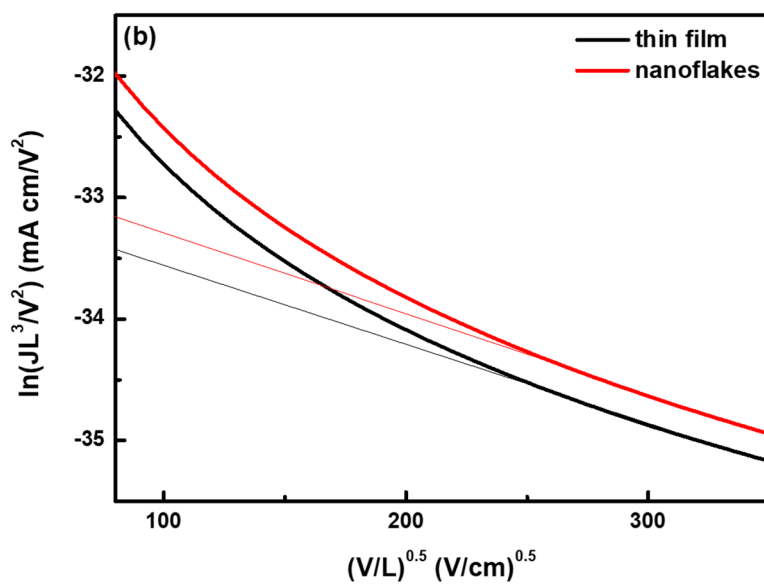

**Figure S7.** (a) Current–voltage characteristics of hole-only devices FTO/NiO<sub>x</sub> thin film or nanoflakes/Ag and electron-only device FTO/PCBM+TBABF<sub>4</sub>/PEI/Ag; (b) hole mobility of the NiO<sub>x</sub> thin film or nanoflakes versus electric field (V/L)<sup>0.5</sup>.

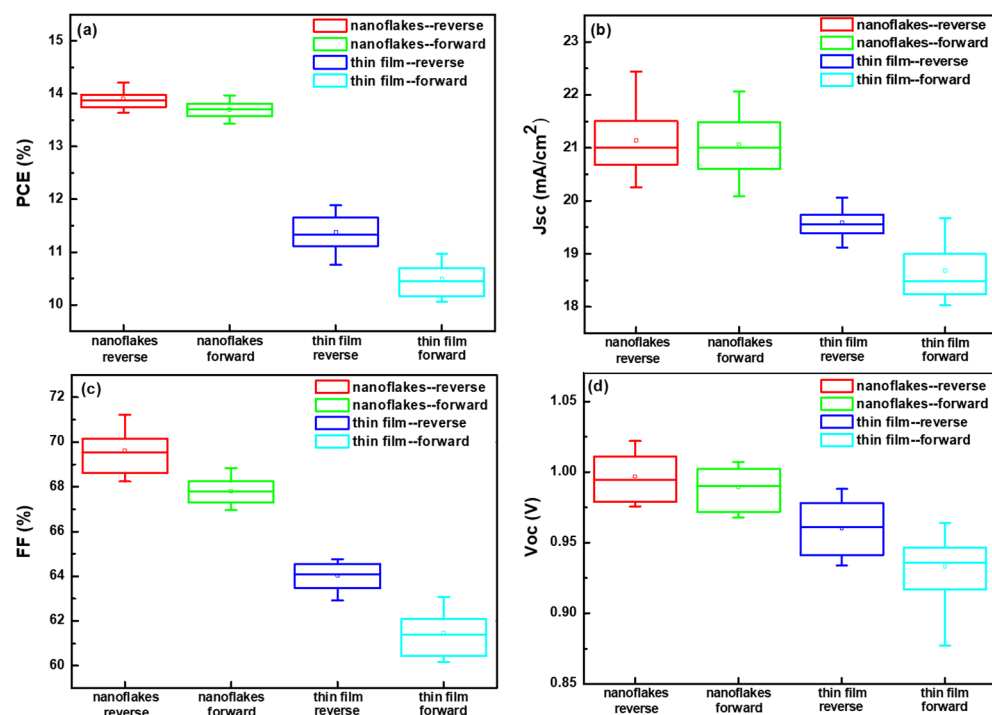

**Figure S8.** Performance variation represented as a standard box plot in (a) PCE, (b) J<sub>sc</sub>, (c) FF, and (d) V<sub>oc</sub> from 20 devices based on the NiO<sub>x</sub> thin film and nanoflakes in the forward and reverse scans.
